# Supplementary material for: Stable synthesis of few-layered boron nitride nanotubes by anodic arc discharge
Source: PubMed Central journal article supplement (PMC5465186; doi:10.1038/s41598-017-03438-w), 2017-06-08

## Supplementary Information

### Stable synthesis of few-layered boron nitride nanotubes by anodic arc discharge

Yao-Wen Yeh, Yevgeny Raitses, Bruce E. Koel, and Nan Yao

**Supplementary Fig. S1:** BNNT containing fibrous products deposited on the material collector sheet placed under the electrodes during synthesis experiments.

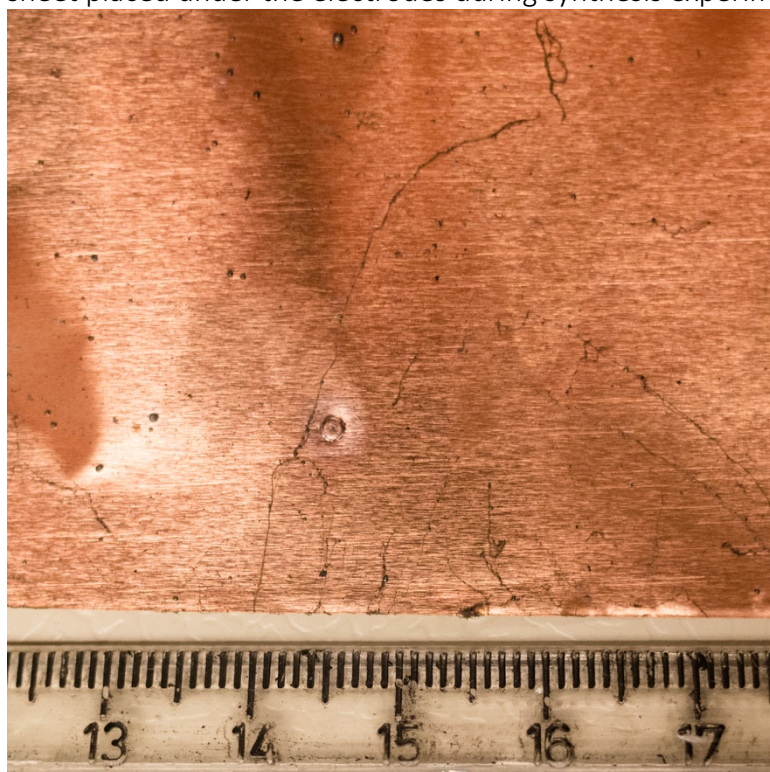

Supplement: 41598_2017_3438_MOESM1_ESM.pdf [file 41598_2017_3438_MOESM1_ESM.pdf]
